# Supplementary material for: Microtopography mediates the climate–growth relationship and growth resilience to drought of Pinus tabulaeformis plantation in the hilly site
Source: Frontiers journal article supplement (doi:10.3389/fpls.2022.1060011), 2022-11-22
Supplement: Image_1.PDF [file Image_1.PDF]

## Supplementary Material

### 1 Supplementary Figures

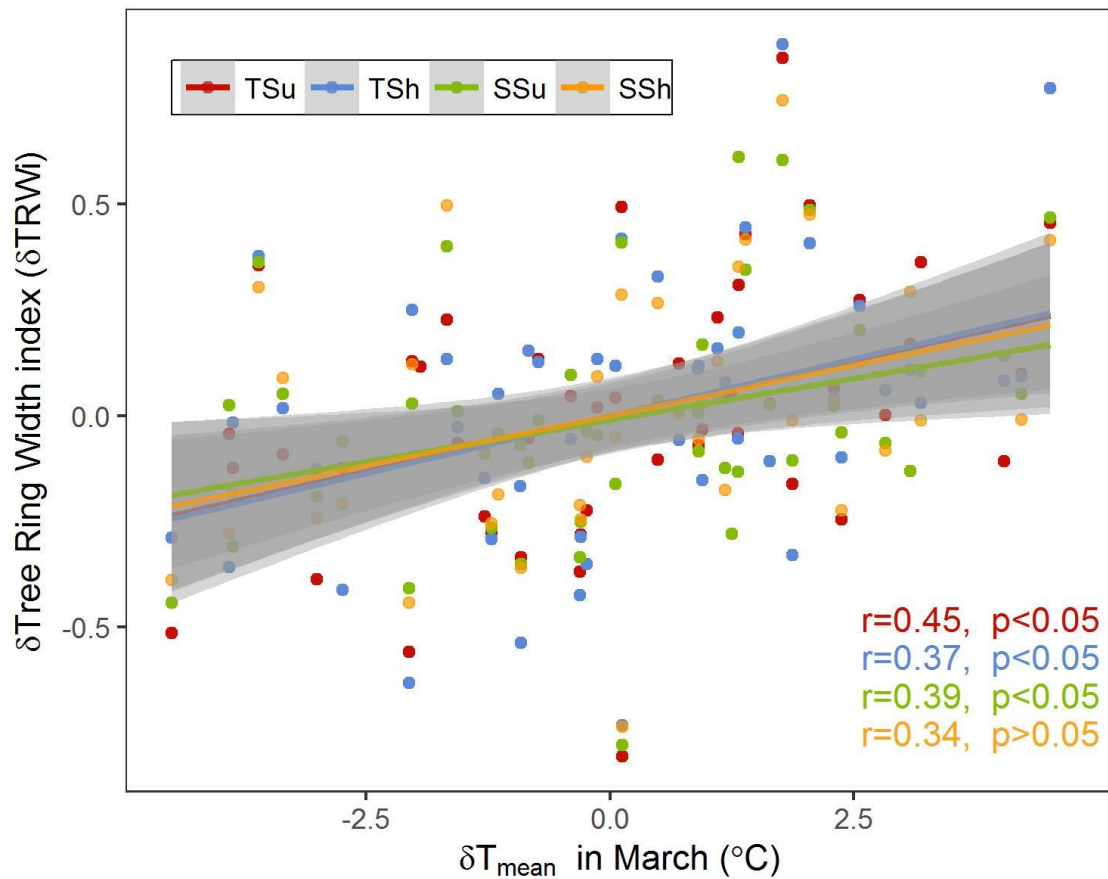

**Supplementary Figure 1.** Correlate the first-order difference of standard chronologies (STDs) of tree ring width index (TRWi) in all plots with that of monthly mean temperature ( $T_{\text{mean}}$ ) in March.
